# Supplementary material for: Design of a thermoregulated phase-separable system for homogeneous enzymolysis of cellulose
Source: Royal Society of Chemistry journal article supplement (doi:10.1039/c5gc00325c), 2015-01-01
Supplement: c5gc00325c1.pdf [file c5gc00325c1.pdf]

## Supplementary Information

### Design of a Thermoregulated Phase-Separable System for Homogeneous Enzymolysis of Cellulose

Lu Li, <sup>a\*</sup> Xianhong Liu, <sup>a</sup> Shitao Yu, <sup>a\*</sup> Shiwei Liu, <sup>a</sup> Fusheng Liu, <sup>a</sup> Congxia Xie <sup>b</sup>

<sup>a</sup> College of Chemical Engineering, Qingdao University of Science and Technology, 53 Zhengzhou Road, Qingdao 266042, P. R. China. Fax: +86 0532 84022719; Tel: +86 0532 84022864; E-mail: yushitaoqust@126.com

<sup>b</sup> Key Laboratory of Eco-Chemical Engineering, Ministry of Education, College of Chemistry and Molecular Engineering, Qingdao University of Science and Technology, 53 Zhengzhou Road, Qingdao 266042, P. R. China

#### Preparation of modifier

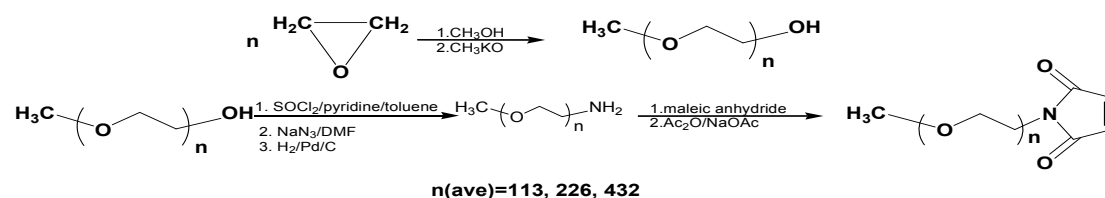

**Scheme S1** Preparation of monomethoxyl-polyethylene glycol maleimide (molecular weight 5000, 10000, 20000; marked: mPEG-Mal 5k, mPEG-Mal 10k, mPEG-Mal 20k, respectively)

#### The physical parameters of natural celluloses

**Table. S1** The physical parameters of these natural celluloses

| Natural Cellulose | Compose/% |               |        |             |
|-------------------|-----------|---------------|--------|-------------|
|                   | Cellulose | Hemicellulose | Lignin | Ash content |
| Straw             | 43.0      | 28.9          | 20.6   | 7.5         |
| willow            | 63.4      | 32.4          | -      | 4.2         |
| pledget           | 73.5      | 23.4          | -      | 3.1         |

## Degree of modification(DM) of modified cellulase

Degree of modification(DM) of thiol groups in a cellulase molecule was determined using the standard Ellman method was adapted.<sup>1</sup> 1.0 mL cellulase solution(10mg/mL) was put into 5mL DTNB solution, after 10 minutes at 25°C, then the solution was assayed at 412 nm, absorbance value was A<sub>0</sub>. At the same time, 1.0 mL modified cellulase solution(10mg/mL) was put into 5mL DTNB solution, after 10 minutes at 25°C, then the solution was assayed at 412 nm, absorbance value was A.

$$DM = \left(1 - \frac{A}{A_0}\right) \times 100\%$$

The DM was defined as follows:

1 P. W. Riddles, R. L. Blakely and B. Zemer, Anal. Biochem. 1979, 94, 75.

## The <sup>1</sup>H-NMR of Cell-Mal

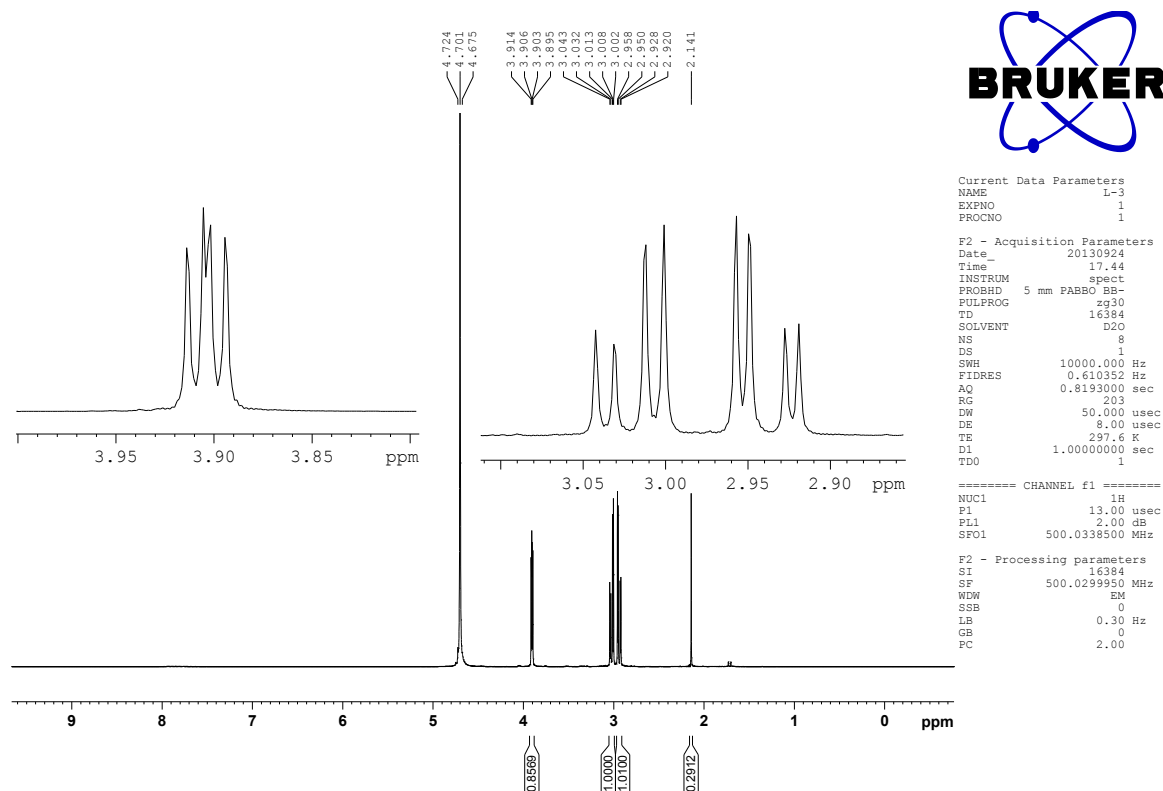

Figure S1 <sup>1</sup>H-NMR of Cell-Mal
